# Supplementary material for: Evaluating CollaboRATE in a clinical setting: analysis of mode effects on scores, response rates and costs of data collection
Source: PubMed Central journal article supplement — BMJ Open. 2017 Mar 24;7(3):e014681. doi: 10.1136/bmjopen-2016-014681 (PMC5372080; doi:10.1136/bmjopen-2016-014681), 2017-03-24
Supplement: bmjopen-2016-014681supp_appendices.pdf [file bmjopen-2016-014681supp_appendices.pdf]

## Appendix 1

Logistic regression results: model used to predict clinician scores

|                                       | OR    | 95% CI |       |
|---------------------------------------|-------|--------|-------|
| <b>Administration mode</b>            |       |        |       |
| <b>Mode 1: paper (reference)</b>      | 1     | --     | --    |
| <b>Mode 2: Patient-portal</b>         | 0.587 | 0.439  | 0.786 |
| <b>Mode 3: IVR</b>                    | 0.451 | 0.340  | 0.599 |
| <b>Mode 4: SMS</b>                    | 0.523 | 0.389  | 0.703 |
| <b>Female</b>                         | 1.020 | 0.851  | 1.222 |
| <b>Age</b>                            | 1.010 | 1.004  | 1.015 |
| <b>Number of morbidities</b>          | 1.054 | 0.956  | 1.163 |
| <b>Annual wellness visit</b>          | 1.137 | 0.930  | 1.391 |
| <b>Percent in zip code in poverty</b> | 0.993 | 0.980  | 1.005 |
| <b>Marital status</b>                 |       |        |       |
| <b>Single (reference)</b>             | 1     | --     | --    |
| <b>Married/Partner/Civil union</b>    | 1.096 | 0.874  | 1.374 |
| <b>Formerly married</b>               | 1.208 | 0.915  | 1.594 |
| <b>Clinician ID</b>                   |       |        |       |
| <b>Clinician A (reference)</b>        | 1     | --     | --    |
| <b>Clinician B</b>                    | 0.341 | 0.379  | 3.079 |
| <b>Clinician C</b>                    | 0.455 | 0.049  | 4.221 |
| <b>Clinician D</b>                    | 0.350 | 0.014  | 8.665 |
| <b>Clinician E</b>                    | 0.871 | 0.103  | 7.385 |
| <b>Clinician F</b>                    | 0.408 | 0.049  | 3.404 |
| <b>Clinician G</b>                    | 0.369 | 0.044  | 3.088 |
| <b>Clinician H</b>                    | 0.636 | 0.076  | 5.312 |
| <b>Clinician I</b>                    | 0.279 | 0.034  | 2.313 |
| <b>Clinician J</b>                    | 0.745 | 0.077  | 7.227 |
| <b>Clinician K</b>                    | 0.402 | 0.040  | 4.023 |
| <b>Clinician L</b>                    | 0.344 | 0.041  | 2.878 |
| <b>Clinician M</b>                    | 0.495 | 0.058  | 4.201 |
| <b>Clinician N</b>                    | 0.500 | 0.060  | 4.151 |
| <b>Clinician O</b>                    | 0.333 | 0.038  | 2.942 |
| <b>Clinician P</b>                    | 0.587 | 0.066  | 5.221 |
| <b>Clinician Q</b>                    | 0.220 | 0.026  | 1.859 |
| <b>Clinician R</b>                    | 0.251 | 0.030  | 2.076 |

|                    |       |       |        |
|--------------------|-------|-------|--------|
| <b>Clinician S</b> | 0.578 | 0.064 | 5.221  |
| <b>Clinician T</b> | 0.247 | 0.029 | 2.071  |
| <b>Clinician U</b> | 0.324 | 0.039 | 2.715  |
| <b>Clinician V</b> | 0.541 | 0.053 | 5.564  |
| <b>Clinician W</b> | 1.017 | 0.078 | 13.295 |
| <b>Clinician X</b> | 1.108 | 0.083 | 14.710 |
| <b>Clinician Y</b> | 0.190 | 0.022 | 1.659  |
| <b>Clinician Z</b> | 0.259 | 0.019 | 3.464  |
| <b>Constant</b>    | 5.765 | 0.674 | 49.327 |

## Appendix 2

Predicted CollaboRATE scores by clinician, adjusted for patient characteristics

| Clinician | Mode 1: Paper |        | Mode 2: Patient-portal |        | Mode 3: IVR |        | Mode 4: SMS |        |
|-----------|---------------|--------|------------------------|--------|-------------|--------|-------------|--------|
|           | Score         | 95% CI | Score                  | 95% CI | Score       | 95% CI | Score       | 95% CI |
| 1         | 91%           | 87-94% | 84%                    | 79-90% | 79%         | 73-86% | 82%         | 76-88% |
| 2         | 82%           | 77-87% | 72%                    | 65-78% | 64%         | 57-72% | 68%         | 61-75% |
| 3         | 80%           | 75-86% | 70%                    | 63-77% | 62%         | 54-70% | 66%         | 58-74% |
| 4         | 88%           | 84-92% | 80%                    | 75-85% | 74%         | 67-80% | 77%         | 71-83% |
| 5         | 76%           | 69-82% | 63%                    | 57-70% | 55%         | 48-62% | 59%         | 52-66% |
| 6         | 79%           | 73-86% | 68%                    | 61-76% | 60%         | 52-69% | 64%         | 56-73% |
| 7         | 85%           | 80-89% | 76%                    | 71-81% | 69%         | 63-75% | 72%         | 67-78% |
| 8         | 74%           | 68-80% | 61%                    | 55-67% | 53%         | 46-59% | 57%         | 50-63% |

### Appendix 3

Administration mode and patient demographic effects on CollaboRATE top score

|                                | <b>Odds ratio</b> | <b>95% Confidence interval</b> |       |
|--------------------------------|-------------------|--------------------------------|-------|
| <b>Administration modes</b>    |                   |                                |       |
| Paper mode (reference)         | 1                 | --                             | --    |
| Patient-portal mode            | 0.602             | 0.452                          | 0.802 |
| IVR mode                       | 0.447             | 0.338                          | 0.590 |
| SMS mode                       | 0.505             | 0.378                          | 0.674 |
| Tablet/Mail mode *             | --                | --                             | --    |
| <b>Patient characteristics</b> |                   |                                |       |
| Age                            | 1.010             | 1.005                          | 1.016 |
| Female                         | 1.008             | 0.844                          | 1.204 |
| Number of health conditions    | 1.062             | 0.964                          | 1.169 |
| Annual visit                   | 1.167             | 0.957                          | 1.423 |
| Aggregate percent in poverty   | 0.992             | 0.98                           | 1.005 |
| Never married (reference)      | 1                 | --                             | --    |
| Married/Civil union/Partner    | 1.084             | 0.867                          | 1.357 |
| Formerly married               | 1.205             | 0.915                          | 1.586 |

\* Demographic data were unavailable for tablet/mail mode participants

#### Appendix 4

Administration mode and patient demographic effects on CollaboRATE top score: first response per patient sensitivity analysis

|                                | <b>Odds ratio</b> | <b>95% Confidence interval</b> |       |
|--------------------------------|-------------------|--------------------------------|-------|
| <b>Administration modes</b>    |                   |                                |       |
| Paper mode (reference)         | 1                 | --                             | --    |
| Patient-portal mode            | 0.569             | 0.375                          | 0.863 |
| IVR mode                       | 0.414             | 0.258                          | 0.665 |
| SMS mode                       | 0.502             | 0.277                          | 0.913 |
| Tablet/Mail mode *             | --                | --                             | --    |
| <b>Patient characteristics</b> |                   |                                |       |
| Age                            | 1.012             | 1.000                          | 1.025 |
| Female                         | 1.190             | 0.839                          | 1.689 |
| Number of health conditions    | 1.171             | 0.980                          | 1.398 |
| Annual visit                   | 1.651             | 1.149                          | 2.372 |
| Aggregate percent in poverty   | 0.977             | 0.954                          | 1.000 |
| Never married (reference)      | 1                 | --                             | --    |
| Married/Civil union/Partner    | 1.154             | 0.734                          | 1.815 |
| Formerly married               | 1.148             | 0.657                          | 2.005 |

\* Demographic data were unavailable for tablet/mail mode participants

## Appendix 5

Estimated costs for each mode

|                                                                                | Mode 1          | Mode 2         | Mode 3  | Mode 4  | Mode 5   |               |
|--------------------------------------------------------------------------------|-----------------|----------------|---------|---------|----------|---------------|
|                                                                                | In-clinic Paper | Patient-portal | IVR     | SMS     | Tablet   | Mail-in Paper |
| <b>Set-up costs</b>                                                            |                 |                |         |         |          |               |
| document development                                                           | \$286           | \$486          | \$428   | \$286   | \$143    | \$286         |
| programming and testing                                                        | \$286           | \$515          | \$1,686 | \$1,686 | \$-      | \$-           |
| project management:<br>Ramp-up period                                          | \$234           | \$234          | \$234   | \$234   | \$234    | \$234         |
| <b>Field costs</b>                                                             |                 |                |         |         |          |               |
| vendor costs                                                                   | \$-             | \$-            | \$127   | \$165   | \$-      | \$-           |
| EHR costs                                                                      | \$-             | \$-            | \$-     | \$-     | \$-      | \$-           |
| supplies                                                                       | \$492           | \$-            | \$-     | \$-     | \$597    | \$167         |
| technical support                                                              | \$-             | \$2,036        | \$2,202 | \$2,202 | \$-      | \$-           |
| Personnel                                                                      | \$5,825         | \$208          | \$202   | \$175   | \$18,113 | \$54          |
| <b>Data analysis costs</b>                                                     |                 |                |         |         |          |               |
| Data entry                                                                     | \$966           | \$-            | \$-     | \$-     | \$-      | \$123         |
| Report Generation/ data collection                                             | \$3,038         | \$3,038        | \$3,038 | \$3,038 | \$-      | \$-           |
| <b>Total</b>                                                                   | \$11,125        | \$6,516        | \$7,916 | \$7,785 | \$19,086 | \$863         |
| total responses                                                                | 541             | 1019           | 893     | 757     | 1142     | 69            |
| <b>Cost per unique response</b>                                                | \$20.56         | \$6.39         | \$8.87  | \$10.28 | \$16.71  | \$12.51       |
| <b>Variable cost per unique response</b> (excluding set-up and research costs) | \$13.46         | \$2.20         | \$2.83  | \$3.36  | \$16.38  | \$4.97        |
